# Supplementary material for: Uncoupling of p97 ATPase activity has a dominant negative effect on protein extraction
Source: PubMed Central journal article supplement (PMC6637110; doi:10.1038/s41598-019-46949-4), 2019-07-17
Supplement: 41598_2019_46949_MOESM1_ESM.pdf [file 41598_2019_46949_MOESM1_ESM.pdf]

## Supplemental Information

### Uncoupling of p97 ATPase activity has a dominant negative effect on protein extraction

Halley B. Rycenga<sup>1</sup>, Kelly B. Wolfe<sup>1</sup>, Elizabeth S. Yeh<sup>2</sup>, David T. Long<sup>1\*</sup>

<sup>1</sup> Department of Biochemistry and Molecular Biology  
Medical University of South Carolina, Charleston, SC 29425, USA

<sup>2</sup> Department of Pharmacology and Toxicology  
Indiana University School of Medicine, Indianapolis, IN 46202, USA

\* To whom correspondence should be addressed. Email: [longdt@musc.edu](mailto:longdt@musc.edu)

## Supplemental Figures

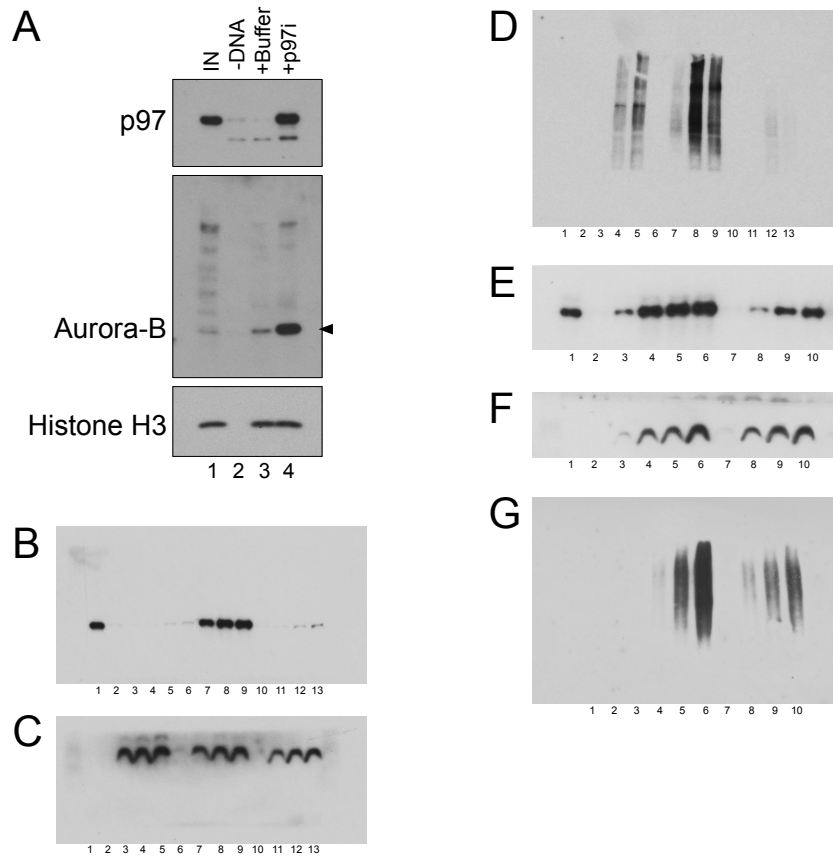

**Figure S1.** (A). pDNA was incubated in extract supplemented with buffer or CB-5083 (p97i) for 120 minutes. DNA-bound proteins were isolated by plasmid pull-down and visualized by Western blot with the indicated antibodies. Unmodified Aurora-B indicated by closed arrowhead. Full Western blots from Figure 1A: (B) p97, (C) Histone H3, and (D) Total ubiquitin. Full Western blots from Figure 1D: (E) p97, (F) Histone H3, and (G) Total Ubiquitin.

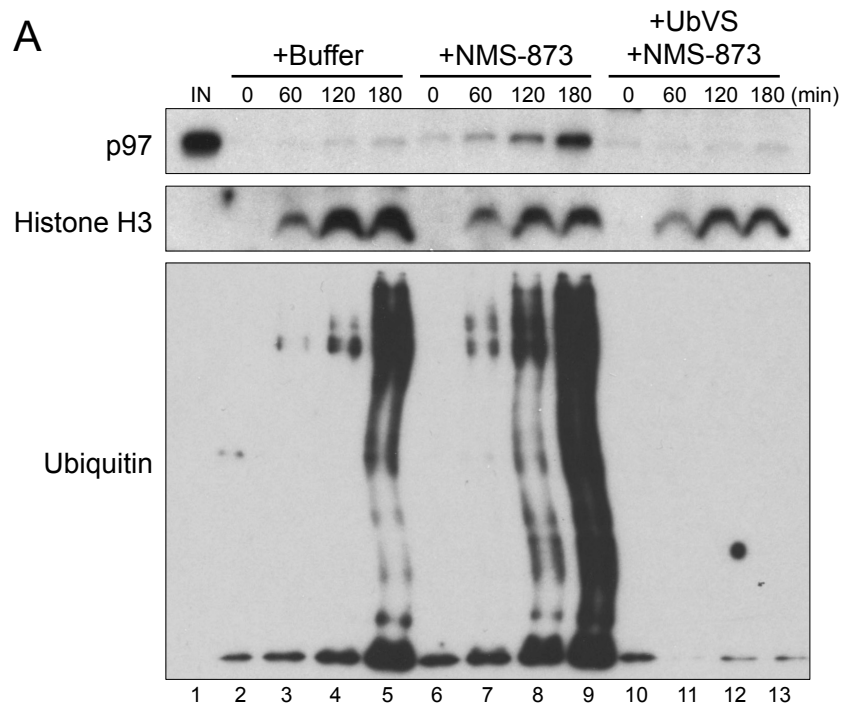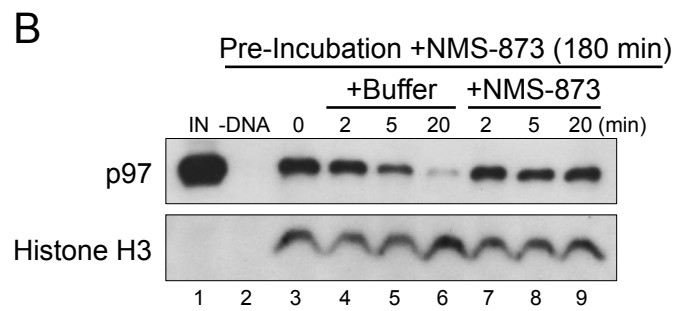

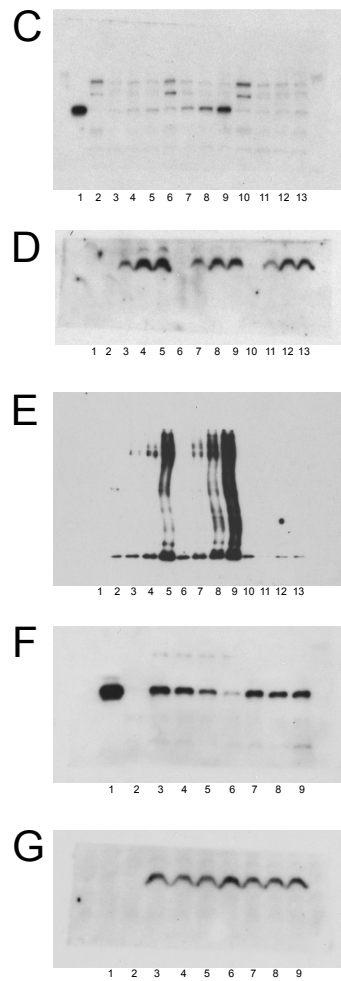

**Figure S2. p97 inhibition with NMS-873.** (A) pDNA was incubated in extract supplemented with Buffer, NMS-873, or NMS-873 and UbVS. DNA-bound proteins were isolated by plasmid pull-down at the indicated times and visualized by Western blot. (B) pDNA was incubated in extract supplemented with NMS-873. After 180 minutes, DNA was isolated by plasmid pull-down and then incubated in buffer with or without NMS-873. At various times, DNA-bound proteins were recovered and visualized by Western blot with the indicated antibodies. Full Western blot images are shown for (A) (C-E), and (B) (E-G).

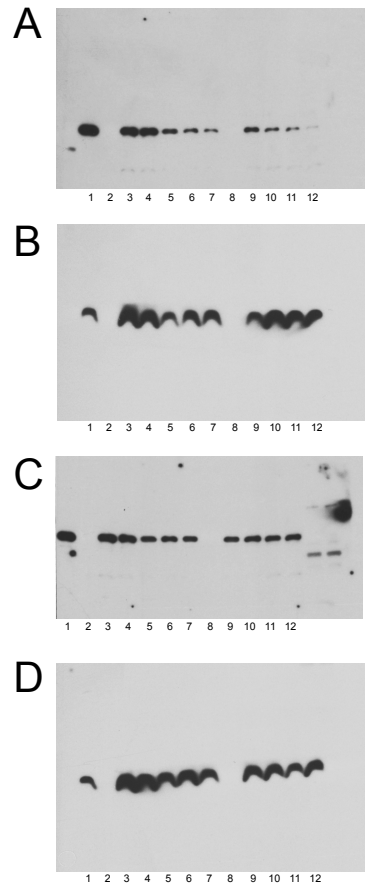

**Figure S3.** Full Western blots from Figure 2A: **(A)** p97, **(B)** Histone H3; and Figure 2B: **(C)** p97, **(D)** Histone H3.

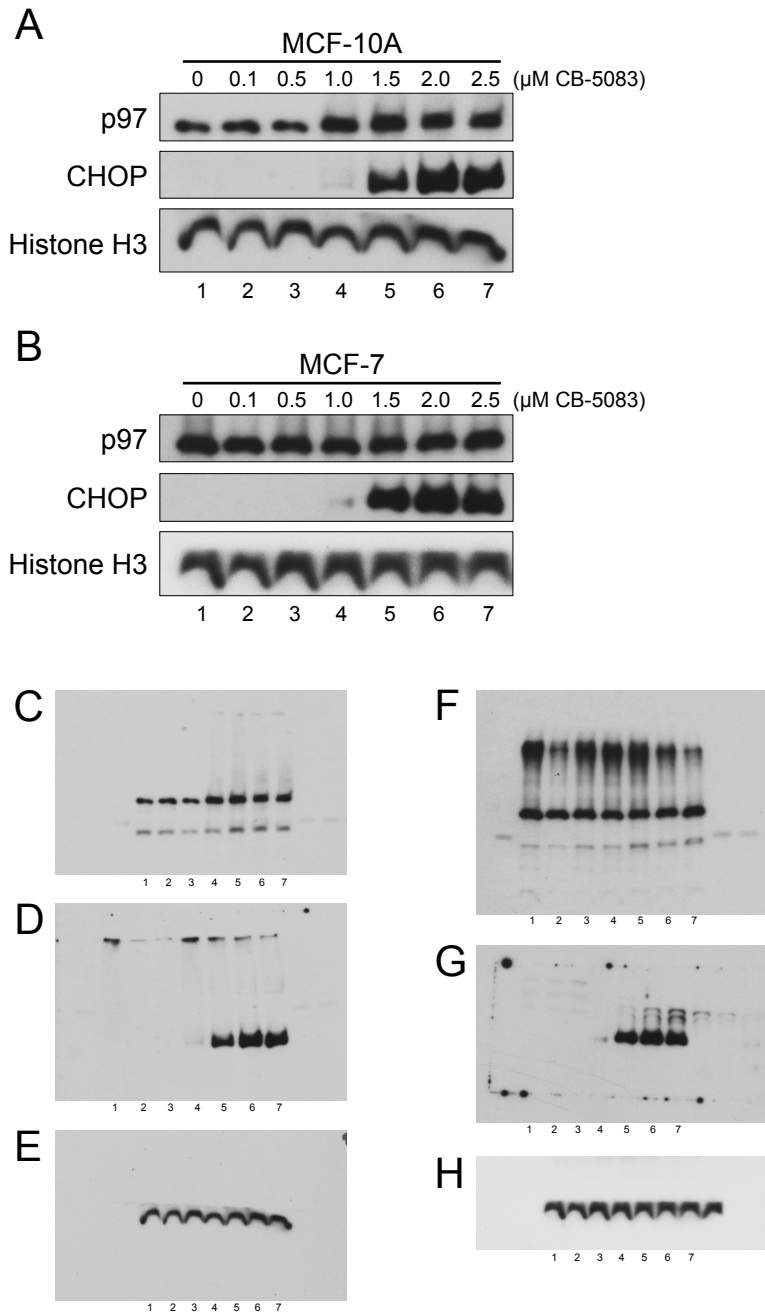

**Figure S4. Protein levels in CB-5083-treated cells. (A)** MCF-10A and **(B)** MCF-7 cells were treated with Buffer or the indicated concentration of CB-5083 for 24 hours. Total protein was analyzed from cell lysates by Western blot with the indicated antibodies. Full Western blot images are shown for **(A)** **(C-E)**, and **(B)** **(F-H)**.

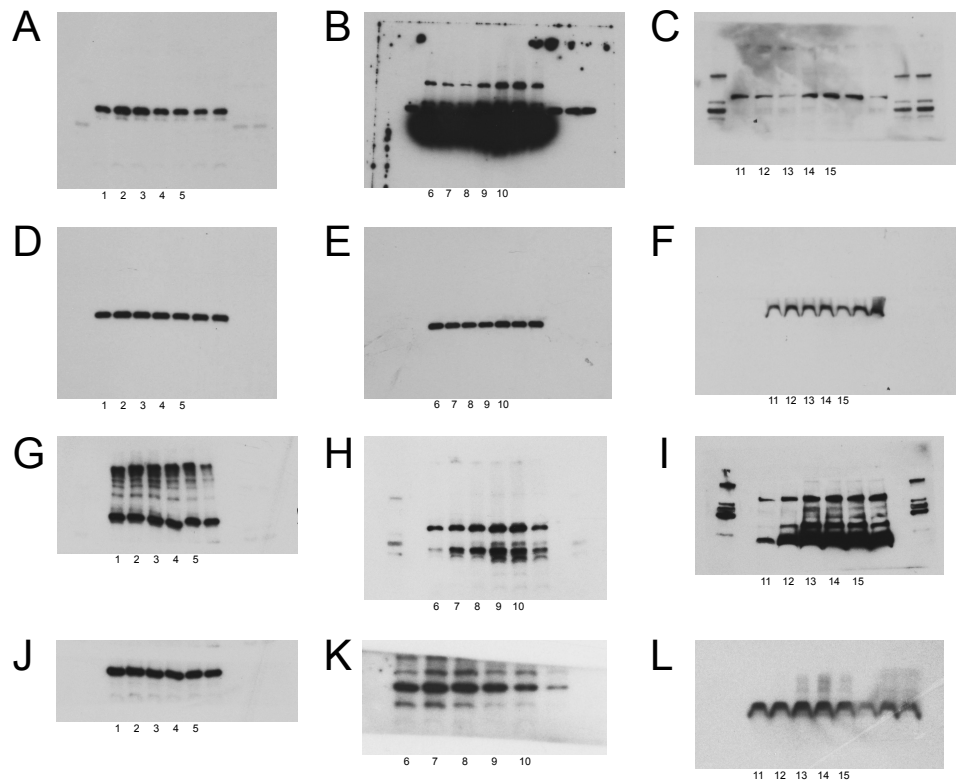

**Figure S5.** Full Western blots from Figure 4A: **(A)** Cytoplasmic p97, **(B)** Soluble nuclear p97 (with overexposed Actin below), **(C)** Chromatin-bound p97, **(D)** Cytoplasmic Actin, **(E)** Soluble nuclear Actin, **(F)** Chromatin-bound Histone H3; and Figure 4B: **(G)** Cytoplasmic p97, **(H)** Soluble nuclear p97, **(I)** Chromatin-bound p97, **(J)** Cytoplasmic Actin, **(K)** Soluble nuclear Actin, **(L)** Chromatin-bound Histone H3. Background bands in p97 blots are presumed to be non-specific or inactive degradation products and were not included in quantification.

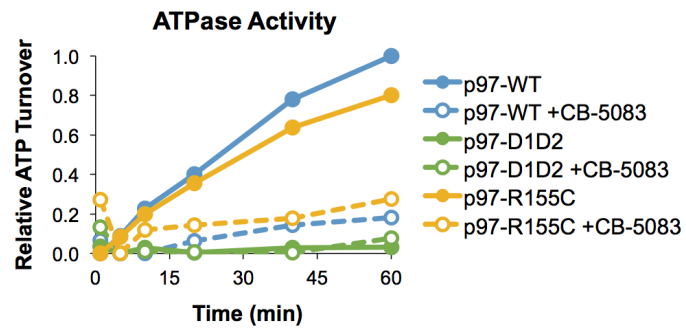

**Figure S6. Recombinant p97 ATPase activity.** Recombinant *Xenopus laevis* p97-WT, p97-D1D2, or p97-R155C was incubated in ELB with 100 mM ATP +/-CB-5083. At the indicated times, reactions were quenched and ADP formation was measured by luminescence. Values are normalized to ATP turnover in the p97-WT reaction.



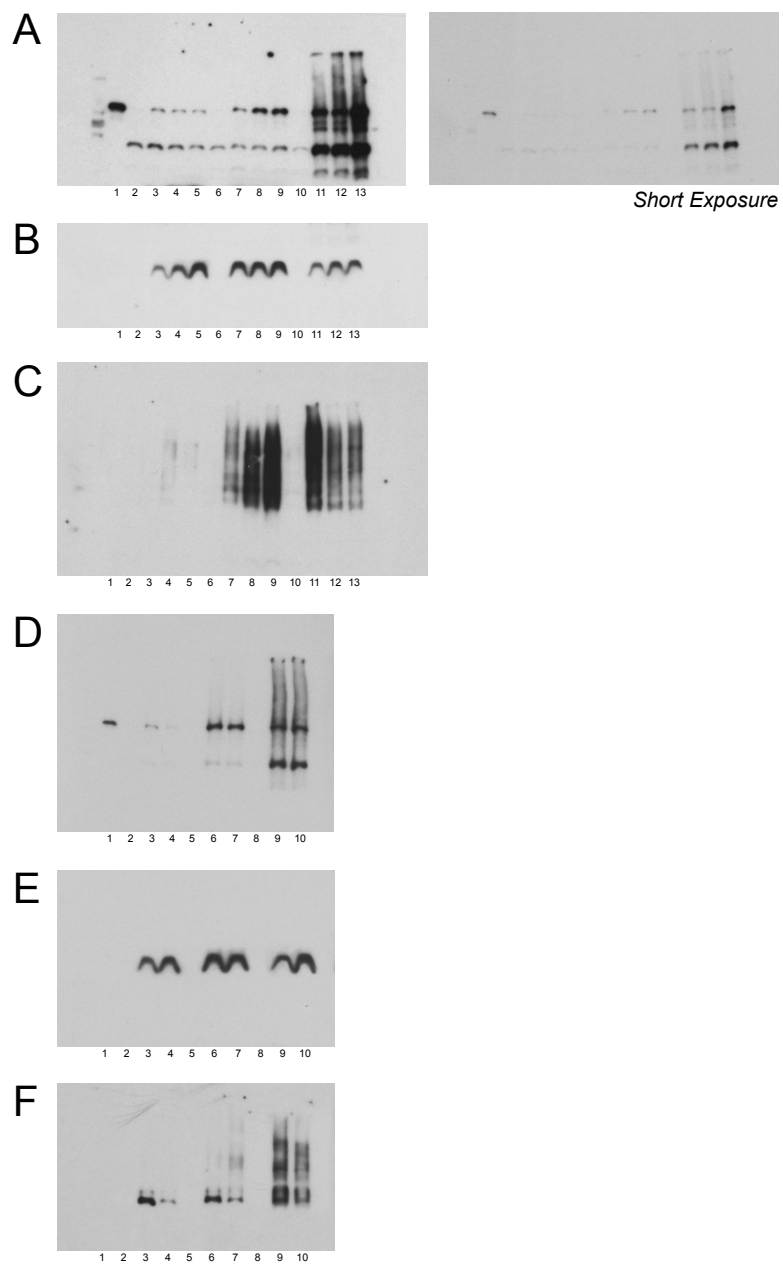

**Figure S7.** Full Western blots from Figure 5A: **(A)** p97, **(B)** Histone H3, **(C)** Total ubiquitin; and Figure 5D: **(D)** p97, **(E)** Histone H3, **(F)** Total ubiquitin.

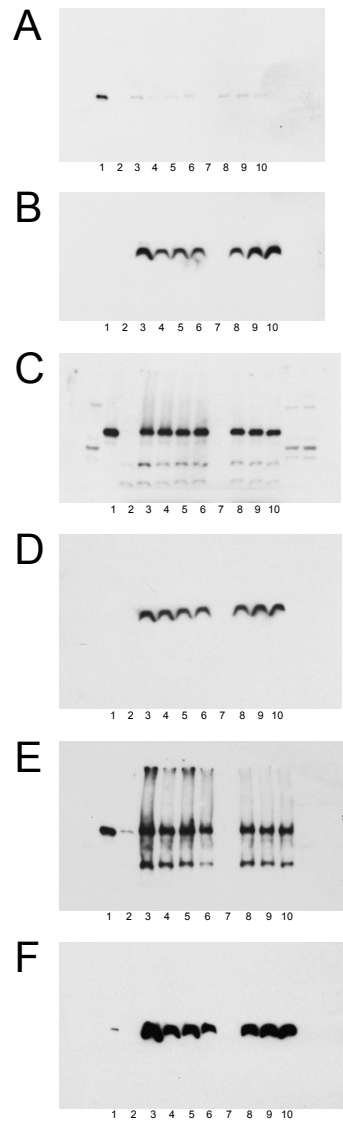

**Figure 58.** Full Western blots from Figure 6A: **(A)** p97, **(B)** Histone H3; Figure 6B: **(C)** p97, **(D)** Histone H3; and Figure 6C: **(E)** p97, **(F)** Histone H3.
